# Supplementary material for: Revealing the biomolecular response of glioma cells to helium, carbon and oxygen minibeam radiation therapy using synchrotron-based infrared microspectroscopy
Source: Royal Society of Chemistry journal article supplement (doi:10.1039/d5an01327e), 2026-06-22

1.5 Gy

5 Gy

10 Gy

Control – BB    Control – MBRT    BB – MBRT    Control – BB    Control – MBRT    BB – MBRT    Control – BB    Control – MBRT    BB – MBRT

FP region (1467–950 cm<sup>-1</sup>)

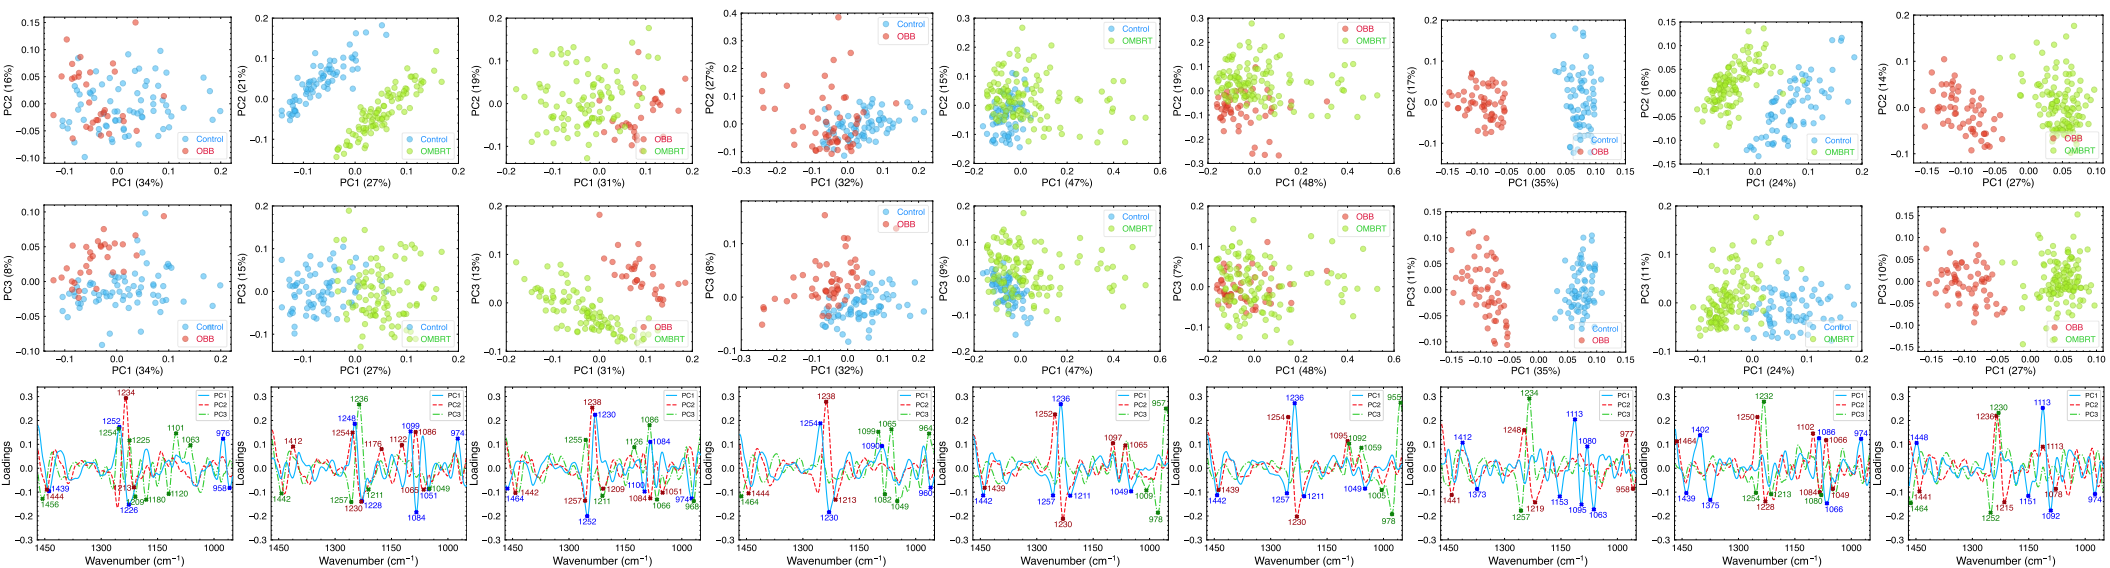

HW region (3000–2800 cm<sup>-1</sup>)

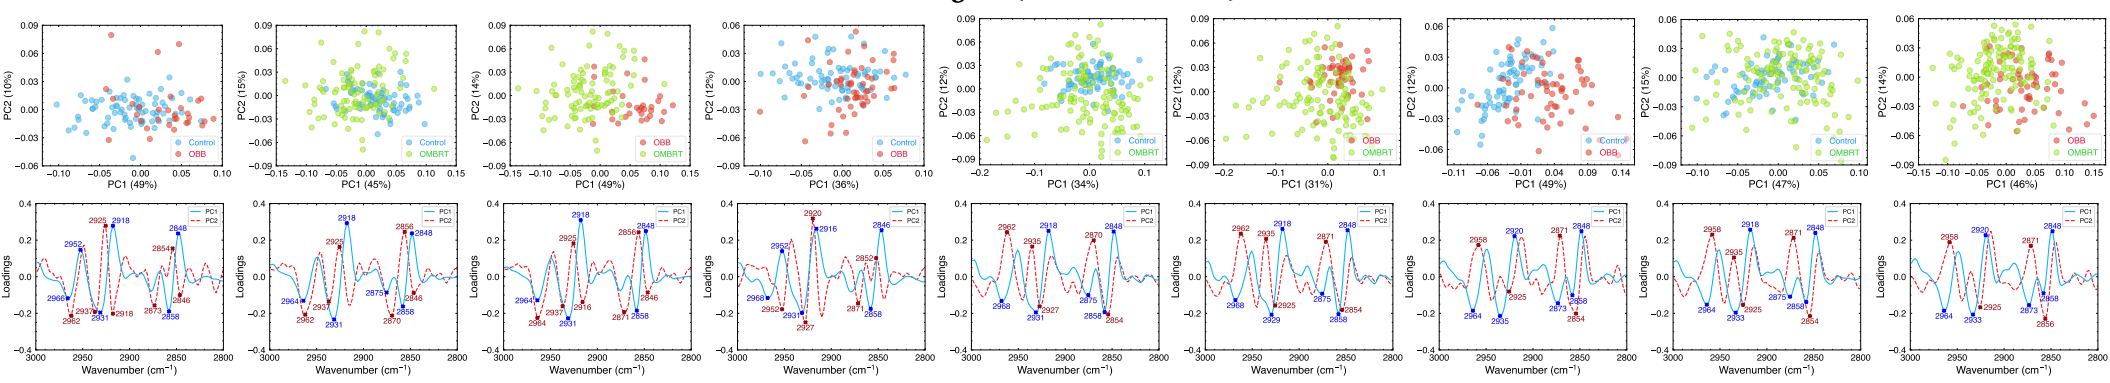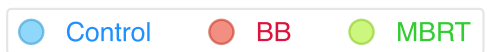

Supplement: d5an01327e4.pdf [file d5an01327e4.pdf]
